# Supplementary material for: Increased Donnan exclusion in charged polymer networks at high salt concentrations
Source: Royal Society of Chemistry journal article supplement (doi:10.1039/d1sm01511g), 2021-12-10
Supplement: d1sm01511g1.xlsx [file d1sm01511g1.xlsx]

## Sheet: Sheet1
m (mol/kg)	Uptake (g)	Uptake std (g)	min/m = φ-/φ-,e	min/m std	min (mol/kg)	ρe (g/cm3)	φp,tot	φp,tot std	φp	φp std	φ-e
0	87	4.24264	0	0	0	1.18192	0.561317	0.0120081	0.108456	0.00232018	0
0.102955	68	4.24264	0.146	0.02771	0.0150314	1.18249	0.620904	0.0146859	0.119969	0.00283757	0.0059517
0.212179	52	4.24264	0.239	0.04116	0.0507108	1.18382	0.681955	0.0176961	0.131765	0.00341918	0.0121129
0.583771	47	5.65685	0.335	0.06755	0.195563	1.18896	0.704372	0.0250625	0.136097	0.0048425	0.0319699
0.875985	42	5.65685	0.465	0.09866	0.407333	1.19586	0.72839	0.0266462	0.140737	0.0051485	0.0464851
1.40252	38	5.65685	0.627	0.12643	0.879383	1.20905	0.749796	0.0279273	0.144873	0.00539603	0.0704874
2.63389	36	4.24264	0.4525	0.08694	1.19183	1.21644	0.760912	0.0214401	0.147021	0.00414258	0.117793
4.69484	33	4.24264	0.4442	0.07681	2.08545	1.23334	0.778766	0.0221504	0.150471	0.00427982	0.177283
ρPSLiTFSI (g/cm3)	ρPE (g/cm3)	MPSLiTFSI (g/mol)	MPE (g/mol)	ρpolymer,total (g/cm3)	MLiTFSI (g/mol)	ρLiTFSI (g/cm3)	ρEC (g/cm3)	ρDMC (g/cm3)
1.57	0.94	10000	50000	1.06173	287	1.33	1.32	1.07
VLiTFSI (cm3/mol)	VPSLiTFSI (cm3/100 g)	VPE (cm3/100 g)	Vpolymer,total (cm3/100 g)
99	18.1984	75.9878	94.1862
Legend:
Experimental data	Constants
